# Supplementary material
Source: PubMed Central journal article supplement (PMC2586568)
Supplement: 108.130518_1.pdf [file 108.130518_1.pdf]

**A**

Scheme S1

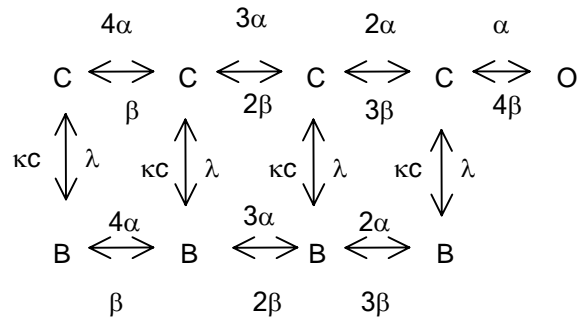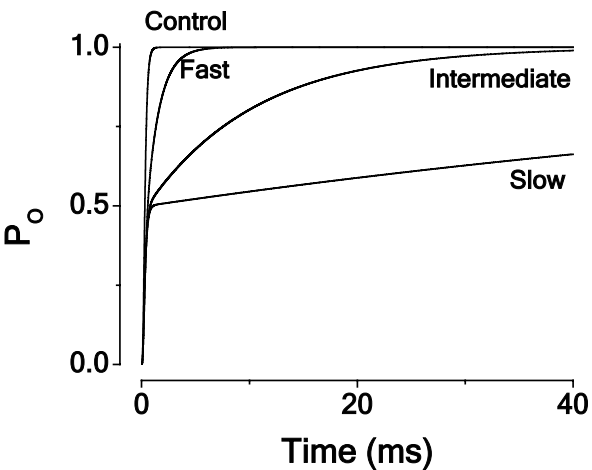**B**

Scheme S2

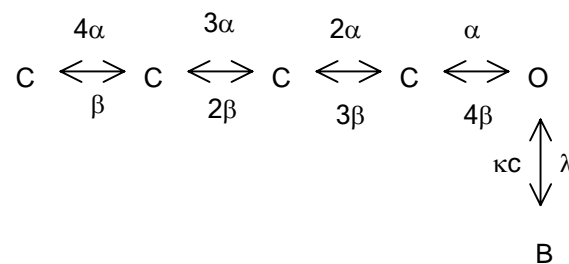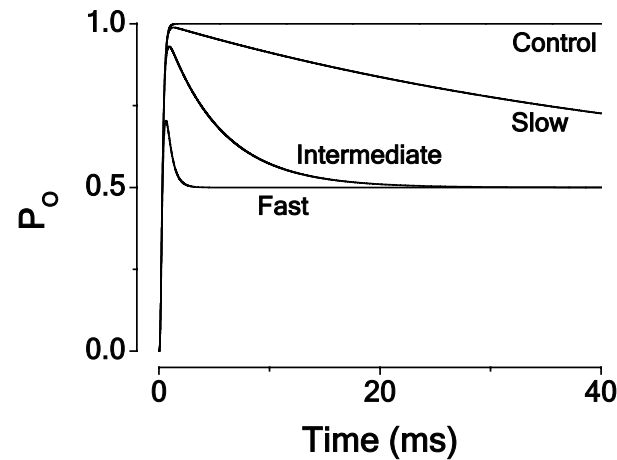**C**

Scheme S3

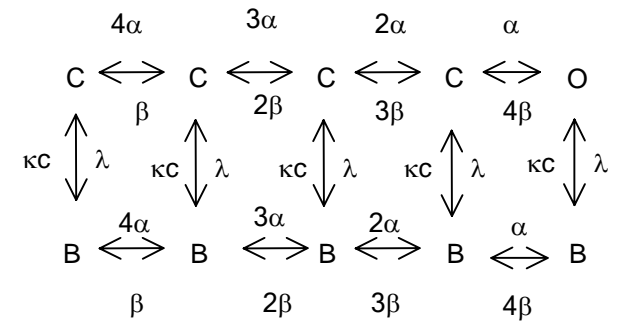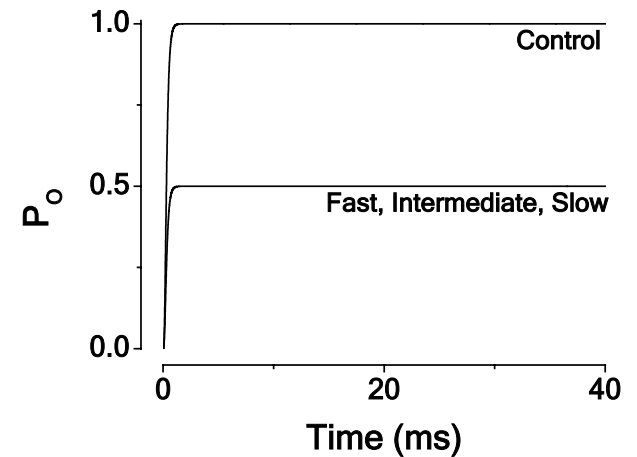

FIGURE S1. Effects of different forms of block of a non-inactivating five-state channel model. The figure shows schemes and computed time courses of open probability for fast, slow and intermediate rates of block. Same symbols, parameter values and equations as used in Fig. 1A and B of the main paper. (A) Scheme 1 (closed-state block). (B) Scheme 2 (open-state block). (C) Scheme 3 (state-independent block).
