# Supplementary material
Source: PubMed Central journal article supplement (PMC2586568)
Supplement: 108.130518_2.pdf [file 108.130518_2.pdf]

**A**

## Scheme S4

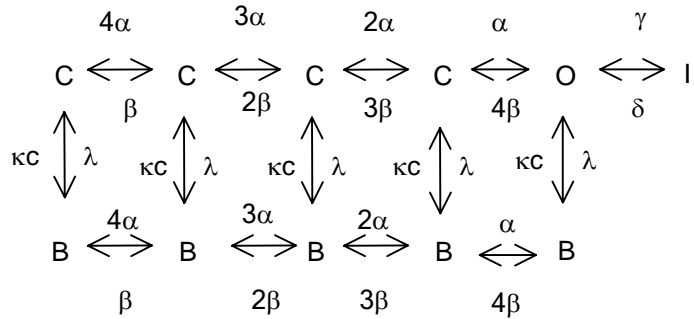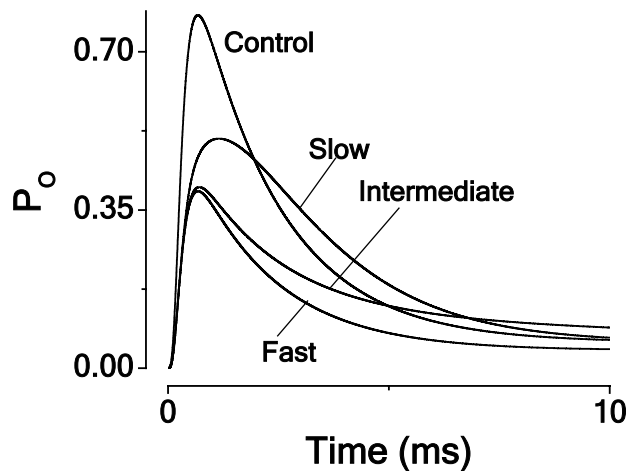**B**

## Scheme S5

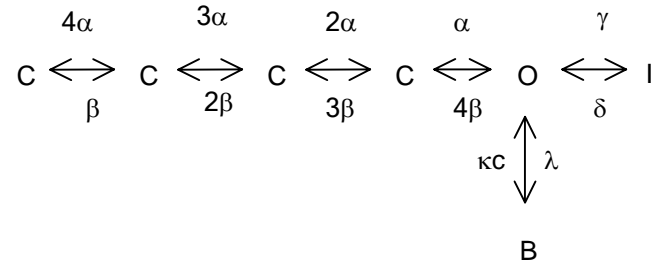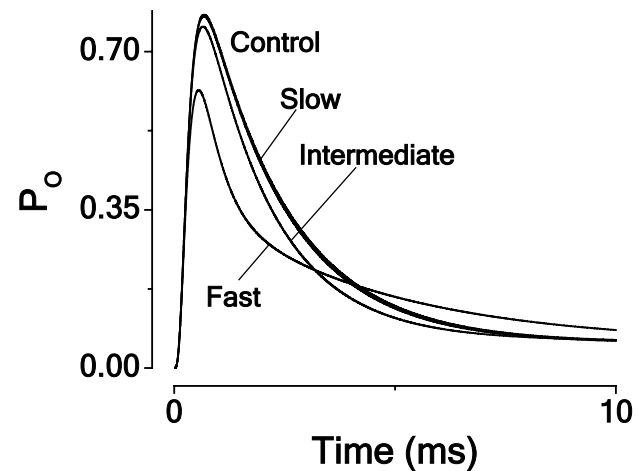

FIGURE S2. Effects of closed-state and open-state block of an inactivating six-state channel model. The figure shows schemes and computed time courses of open probability for fast, slow and intermediate rates of block. Same symbols, parameter values and equations as used in Fig. 2A and B of the main paper. (A) Scheme 4 (closed-state block). (B) Scheme 5 (open-state block).
