# Supplementary material
Source: PubMed Central journal article supplement (PMC2586568)
Supplement: 108.130518_4.pdf [file 108.130518_4.pdf]

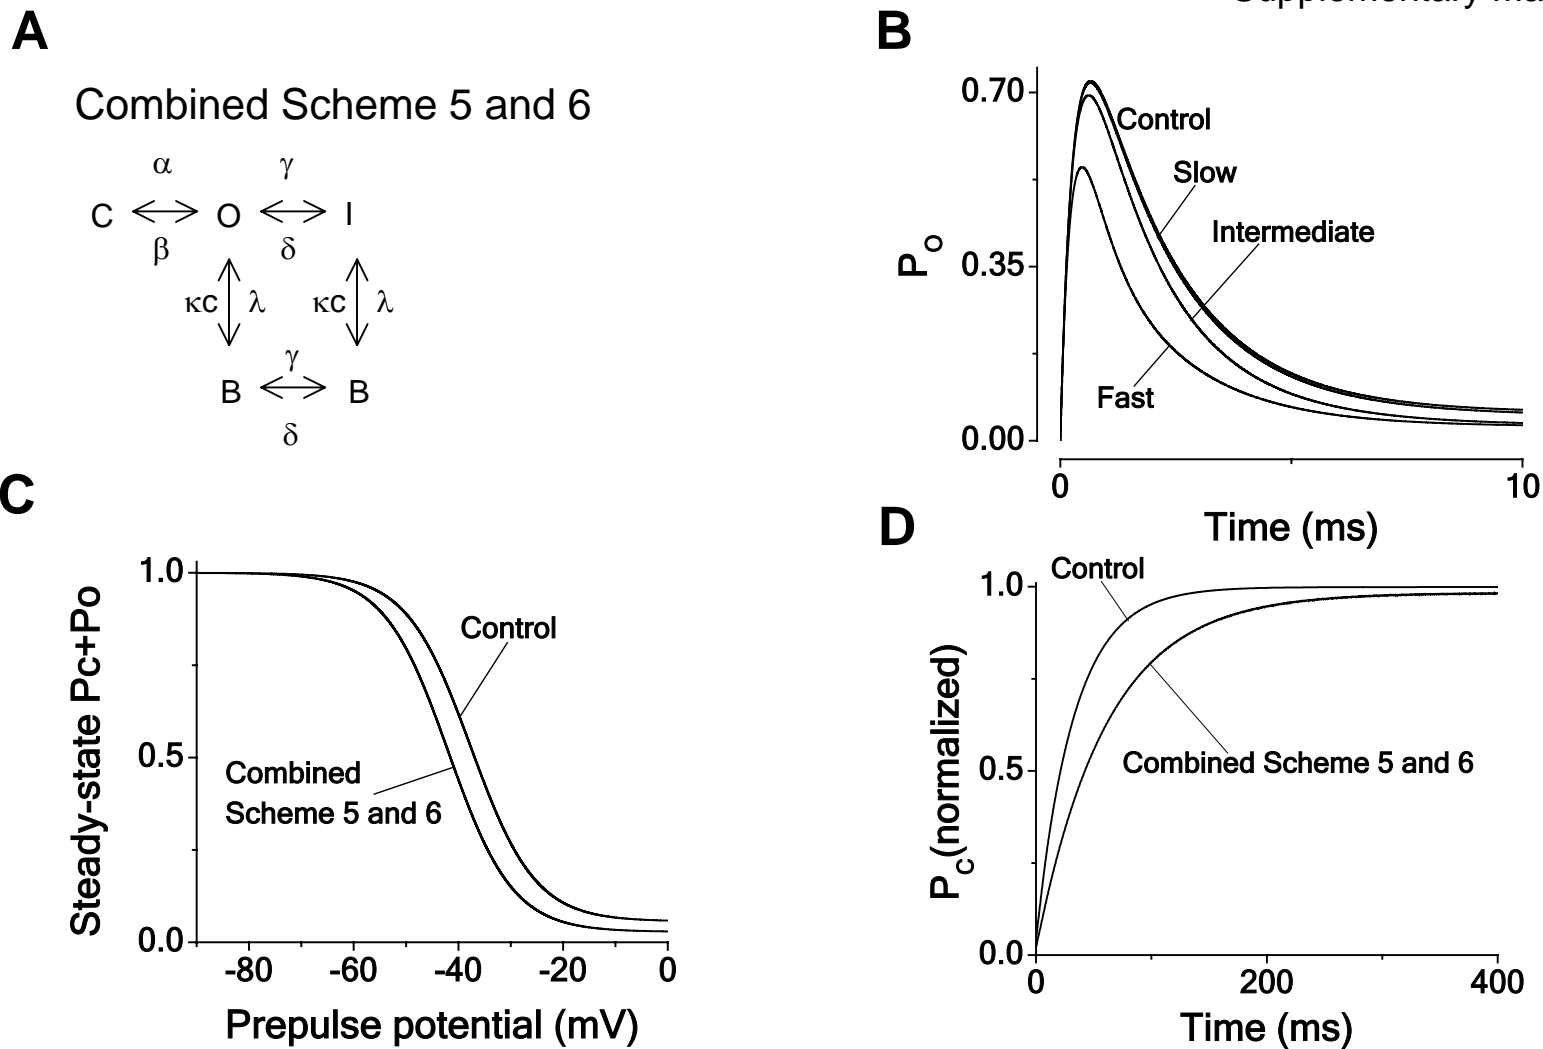

FIGURE S4. Effects of a combined open and inactivated state block of an inactivating three-state channel model (Scheme 5 and 6). (A) and (B) Kinetic scheme and computed time course of open probability for fast, slow and intermediate rates of block. Same symbols, parameters and equations as used in Fig. 2B of the main paper. (C) Computed steady-state inactivation curve. Same parameter values as in Fig. 4A of the main paper. (D) Recovery from inactivation. Same parameter values as in Fig. 4C of the main paper. In summary, the hybrid scheme shows similarities to Scheme 5 with regard to effects on time course, except for the important difference of not showing a crossing-over effect, and similarities to Scheme 6 with regard to effects on inactivation and recovery curves.
